# Supplementary material for: Age, Cognitive Factors, and Acceptance of Living with the Disease in Rheumatoid Arthritis: The Short-Term Perspective
Source: MDPI journal article supplement (doi:10.3390/ijerph19053136), 2022-03-07
Supplement: s1 [file s1]

## Supplementary File 9: T1-T2 and T1 correlation matrix

### Supplementary File 9a1: T1 – T2 IRBs correlation matrix

|           | T2 IRB 1 | T2 IRB 2 | T2 IRB 3 | T2 IRB 4 | T2 IRB 5 | T2 IRB 6 | T2 IRB 7 | T2 IRB 8 | T2 IRB 9 | T2 IRB 10 | T2 IRB 11 | T2 IRB 12 | T2 IRB 13 |
|-----------|----------|----------|----------|----------|----------|----------|----------|----------|----------|-----------|-----------|-----------|-----------|
| T1 IRB 1  | 0.266**  |          |          |          |          |          |          |          |          |           |           |           |           |
| T1 IRB 2  |          | 0.413*** |          |          |          |          |          |          |          |           |           |           |           |
| T1 IRB 3  |          |          | 0.567*** |          |          |          |          |          |          |           |           |           |           |
| T1 IRB 4  |          |          |          | 0.588*** |          |          |          |          |          |           |           |           |           |
| T1 IRB 5  |          |          |          |          | 0.556*** |          |          |          |          |           |           |           |           |
| T1 IRB 6  |          |          |          |          |          | 0.547*** |          |          |          |           |           |           |           |
| T1 IRB 7  |          |          |          |          |          |          | 0.692*** |          |          |           |           |           |           |
| T1 IRB 8  |          |          |          |          |          |          |          | 0.389*** |          |           |           |           |           |
| T1 IRB 9  |          |          |          |          |          |          |          |          | 0.420*** |           |           |           |           |
| T1 IRB 10 |          |          |          |          |          |          |          |          |          | 0.316***  |           |           |           |
| T1 IRB 11 |          |          |          |          |          |          |          |          |          |           | 0.542***  |           |           |
| T1 IRB 12 |          |          |          |          |          |          |          |          |          |           |           | 0.695***  |           |
| T1 IRB 13 |          |          |          |          |          |          |          |          |          |           |           |           | 0.523***  |

IRB – Illness-related belief; \*-p<0.05; \*\*-p<0.01; \*\*\*-p<0.001

### Supplementary File 9a2 T1 – T2 cognitive appraisals correlation matrix

|               | T2 Loss  | T2 Harm  | T2 Benefit | T2 Challenge | T2 Value | T2 Threat | T2 Importance |
|---------------|----------|----------|------------|--------------|----------|-----------|---------------|
| T1 Loss       | 0.734*** |          |            |              |          |           |               |
| T1 Harm       |          | 0.777*** |            |              |          |           |               |
| T1 Benefit    |          |          | 0.646***   |              |          |           |               |
| T1 Challenge  |          |          |            | 0.707***     |          |           |               |
| T1 Value      |          |          |            |              | 0.771*** |           |               |
| T1 Threat     |          |          |            |              |          | 0.713***  |               |
| T1 Importance |          |          |            |              |          |           | 0.583***      |

\*-p<0.05; \*\*-p<0.01; \*\*\*-p<0.001

### Supplementary File 9a2 T1 – T2 acceptance of life with the disease correlation matrix

|                                               | T2 Acceptance: Global score | T2 Satisfaction with Life Despite the Disease | T2 Reconciliation with the Disease | T1 Self-distancing from the Disease |
|-----------------------------------------------|-----------------------------|-----------------------------------------------|------------------------------------|-------------------------------------|
| T1 Acceptance: Global score                   | 0.743***                    |                                               |                                    |                                     |
| T1 Satisfaction with Life Despite the Disease |                             | 0.788***                                      |                                    |                                     |
| T1 Reconciliation with the Disease            |                             |                                               | 0.692***                           |                                     |
| T1 Self-distancing from the Disease           |                             |                                               |                                    | 0.624***                            |

\*-p<0.05; \*\*-p<0.01; \*\*\*-p<0.001

Supplementary File 9b T1 – T2 IRBs correlation matrix in RA patients

|           | T2 IRB 1 | T2 IRB 2 | T2 IRB 3 | T2 IRB 4 | T2 IRB 5 | T2 IRB 6 | T2 IRB 7 | T2 IRB 8 | T2 IRB 9 | T2 IRB 10 | T2 IRB 11 | T2 IRB 12 | T2 IRB 13 |
|-----------|----------|----------|----------|----------|----------|----------|----------|----------|----------|-----------|-----------|-----------|-----------|
| T1 IRB 1  | 0.320**  |          |          |          |          |          |          |          |          |           |           |           |           |
| T1 IRB 2  |          | 0.394*** |          |          |          |          |          |          |          |           |           |           |           |
| T1 IRB 3  |          |          | 0.546*** |          |          |          |          |          |          |           |           |           |           |
| T1 IRB 4  |          |          |          | 0.666*** |          |          |          |          |          |           |           |           |           |
| T1 IRB 5  |          |          |          |          | 0.551*** |          |          |          |          |           |           |           |           |
| T1 IRB 6  |          |          |          |          |          | 0.557*** |          |          |          |           |           |           |           |
| T1 IRB 7  |          |          |          |          |          |          | 0.755*** |          |          |           |           |           |           |
| T1 IRB 8  |          |          |          |          |          |          |          | 0.379**  |          |           |           |           |           |
| T1 IRB 9  |          |          |          |          |          |          |          |          | 0.417*** |           |           |           |           |
| T1 IRB 10 |          |          |          |          |          |          |          |          |          | 0.351**   |           |           |           |
| T1 IRB 11 |          |          |          |          |          |          |          |          |          |           | 0.615***  |           |           |
| T1 IRB 12 |          |          |          |          |          |          |          |          |          |           |           | 0.746***  |           |
| T1 IRB 13 |          |          |          |          |          |          |          |          |          |           |           |           | 0.501***  |

IRB – Illness-related belief; \*-p<0.05; \*\*-p<0.01; \*\*\*-p<0.001

Supplementary File 9b2 T1 – T2 cognitive appraisals correlation matrix in RA patients

|               | T2 Loss  | T2 Harm  | T2 Benefit | T2 Challenge | T2 Value | T2 Threat | T2 Importance |
|---------------|----------|----------|------------|--------------|----------|-----------|---------------|
| T1 Loss       | 0.715*** |          |            |              |          |           |               |
| T1 Harm       |          | 0.773*** |            |              |          |           |               |
| T1 Benefit    |          |          | 0.738***   |              |          |           |               |
| T1 Challenge  |          |          |            | 0.691***     |          |           |               |
| T1 Value      |          |          |            |              | 0.757*** |           |               |
| T1 Threat     |          |          |            |              |          | 0.713***  |               |
| T1 Importance |          |          |            |              |          |           | 0.539***      |

\*-p<0.05; \*\*-p<0.01; \*\*\*-p<0.001

Supplementary File 9b2 T1 – T2 acceptance of life with the disease correlation matrix in RA patients

|                                               | T2 Acceptance: Global score | T2 Satisfaction with Life Despite the Disease | T2 Reconciliation with the Disease | T1 Self-distancing from the Disease |
|-----------------------------------------------|-----------------------------|-----------------------------------------------|------------------------------------|-------------------------------------|
| T1 Acceptance: Global score                   | 0.778***                    |                                               |                                    |                                     |
| T1 Satisfaction with Life Despite the Disease |                             | 0.824***                                      |                                    |                                     |
| T1 Reconciliation with the Disease            |                             |                                               | 0.726***                           |                                     |
| T1 Self-distancing from the Disease           |                             |                                               |                                    | 0.685***                            |

\*-p<0.05; \*\*-p<0.01; \*\*\*-p<0.001

Supplementary File 9c T1 – T2 IRBs correlation matrix in VD patients

|           | T2 IRB 1 | T2 IRB 2 | T2 IRB 3 | T2 IRB 4 | T2 IRB 5 | T2 IRB 6 | T2 IRB 7 | T2 IRB 8 | T2 IRB 9 | T2 IRB 10 | T2 IRB 11 | T2 IRB 12 | T2 IRB 13 |
|-----------|----------|----------|----------|----------|----------|----------|----------|----------|----------|-----------|-----------|-----------|-----------|
| T1 IRB 1  | 0.279    |          |          |          |          |          |          |          |          |           |           |           |           |
| T1 IRB 2  |          | 0.568**  |          |          |          |          |          |          |          |           |           |           |           |
| T1 IRB 3  |          |          | 0.683*** |          |          |          |          |          |          |           |           |           |           |
| T1 IRB 4  |          |          |          | 0.510**  |          |          |          |          |          |           |           |           |           |
| T1 IRB 5  |          |          |          |          | 0.656*** |          |          |          |          |           |           |           |           |
| T1 IRB 6  |          |          |          |          |          | 0.423*   |          |          |          |           |           |           |           |
| T1 IRB 7  |          |          |          |          |          |          | 0.526**  |          |          |           |           |           |           |
| T1 IRB 8  |          |          |          |          |          |          |          | 0.434*   |          |           |           |           |           |
| T1 IRB 9  |          |          |          |          |          |          |          |          | 0.234    |           |           |           |           |
| T1 IRB 10 |          |          |          |          |          |          |          |          |          | 0.226     |           |           |           |
| T1 IRB 11 |          |          |          |          |          |          |          |          |          |           | 0.176     |           |           |
| T1 IRB 12 |          |          |          |          |          |          |          |          |          |           |           | 0.337     |           |
| T1 IRB 13 |          |          |          |          |          |          |          |          |          |           |           |           | 0.525**   |

IRB – Illness-related belief; \*-p<0.05; \*\*-p<0.01; \*\*\*-p<0.001

Supplementary File 9c2 T1 – T2 cognitive appraisals correlation matrix in VD patients

|               | T2 Loss  | T2 Harm  | T2 Benefit | T2 Challenge | T2 Value | T2 Threat | T2 Importance |
|---------------|----------|----------|------------|--------------|----------|-----------|---------------|
| T1 Loss       | 0.726*** |          |            |              |          |           |               |
| T1 Harm       |          | 0.748*** |            |              |          |           |               |
| T1 Benefit    |          |          | 0.354      |              |          |           |               |
| T1 Challenge  |          |          |            | 0.659***     |          |           |               |
| T1 Value      |          |          |            |              | 0.748*** |           |               |
| T1 Threat     |          |          |            |              |          | 0.692***  |               |
| T1 Importance |          |          |            |              |          |           | 0.639***      |

\*-p<0.05; \*\*-p<0.01; \*\*\*-p<0.001

Supplementary File 9c2 T1 – T2 acceptance of life with the disease correlation matrix in VD patients

|                                               | T2 Acceptance: Global score | T2 Satisfaction with Life Despite the Disease | T2 Reconciliation with the Disease | T1 Self-distancing from the Disease |
|-----------------------------------------------|-----------------------------|-----------------------------------------------|------------------------------------|-------------------------------------|
| T1 Acceptance: Global score                   | 0.567**                     |                                               |                                    |                                     |
| T1 Satisfaction with Life Despite the Disease |                             | 0.654***                                      |                                    |                                     |
| T1 Reconciliation with the Disease            |                             |                                               | 0.475*                             |                                     |
| T1 Self-distancing from the Disease           |                             |                                               |                                    | 0.316                               |

\*-p<0.05; \*\*-p<0.01; \*\*\*-p<0.001

Supplementary File 9d T1 – T2 IRBs correlation matrix in diabetes patients

|           | T2 IRB 1 | T2 IRB 2 | T2 IRB 3 | T2 IRB 4 | T2 IRB 5 | T2 IRB 6 | T2 IRB 7 | T2 IRB 8 | T2 IRB 9 | T2 IRB 10 | T2 IRB 11 | T2 IRB 12 | T2 IRB 13 |
|-----------|----------|----------|----------|----------|----------|----------|----------|----------|----------|-----------|-----------|-----------|-----------|
| T1 IRB 1  | 0.190    |          |          |          |          |          |          |          |          |           |           |           |           |
| T1 IRB 2  |          | 0.209    |          |          |          |          |          |          |          |           |           |           |           |
| T1 IRB 3  |          |          | 0.409*   |          |          |          |          |          |          |           |           |           |           |
| T1 IRB 4  |          |          |          | 0.410*   |          |          |          |          |          |           |           |           |           |
| T1 IRB 5  |          |          |          |          | 0.335    |          |          |          |          |           |           |           |           |
| T1 IRB 6  |          |          |          |          |          | 0.563**  |          |          |          |           |           |           |           |
| T1 IRB 7  |          |          |          |          |          |          | 0.682*** |          |          |           |           |           |           |
| T1 IRB 8  |          |          |          |          |          |          |          | 0.327    |          |           |           |           |           |
| T1 IRB 9  |          |          |          |          |          |          |          |          | 0.735*** |           |           |           |           |
| T1 IRB 10 |          |          |          |          |          |          |          |          |          | 0.255     |           |           |           |
| T1 IRB 11 |          |          |          |          |          |          |          |          |          |           | 0.702***  |           |           |
| T1 IRB 12 |          |          |          |          |          |          |          |          |          |           |           | 0.872***  |           |
| T1 IRB 13 |          |          |          |          |          |          |          |          |          |           |           |           | 0.469*    |

IRB – Illness-related belief; \*-p<0.05; \*\*-p<0.01; \*\*\*-p<0.001

Supplementary File 9d2 T1 – T2 cognitive appraisals correlation matrix in diabetes patients

|               | T2 Loss  | T2 Harm  | T2 Benefit | T2 Challenge | T2 Value | T2 Threat | T2 Importance |
|---------------|----------|----------|------------|--------------|----------|-----------|---------------|
| T1 Loss       | 0.752*** |          |            |              |          |           |               |
| T1 Harm       |          | 0.846*** |            |              |          |           |               |
| T1 Benefit    |          |          | 0.595**    |              |          |           |               |
| T1 Challenge  |          |          |            | 0.771***     |          |           |               |
| T1 Value      |          |          |            |              | 0.835*** |           |               |
| T1 Threat     |          |          |            |              |          | 0.705***  |               |
| T1 Importance |          |          |            |              |          |           | 0.357         |

\*-p<0.05; \*\*-p<0.01; \*\*\*-p<0.001

Supplementary File 9d2 T1 – T2 acceptance of life with the disease correlation matrix in diabetes patients

|                                               | T2 Acceptance: Global score | T2 Satisfaction with Life Despite the Disease | T2 Reconciliation with the Disease | T1 Self-distancing from the Disease |
|-----------------------------------------------|-----------------------------|-----------------------------------------------|------------------------------------|-------------------------------------|
| T1 Acceptance: Global score                   | 0.738***                    |                                               |                                    |                                     |
| T1 Satisfaction with Life Despite the Disease |                             | 0.745***                                      |                                    |                                     |
| T1 Reconciliation with the Disease            |                             |                                               | 0.780***                           |                                     |
| T1 Self-distancing from the Disease           |                             |                                               |                                    | 0.699***                            |

\*-p<0.05; \*\*-p<0.01; \*\*\*-p<0.001

Supplementary File 9. T1 (N=83) correlation matrix

|                     | IRB 1   | IRB 2   | IRB 3   | IRB 4   | IRB 5   | IRB 6   | IRB 7   | IRB 8  | IRB 9  | IRB 10  | IRB 11  | IRB 12 | IRB 13 | Loss    | Harm    | Benefit | Challenge | Value   | Threat  | Importance | ALD: Satisfaction | ALD: Reconciliation | ALD: Distancing |
|---------------------|---------|---------|---------|---------|---------|---------|---------|--------|--------|---------|---------|--------|--------|---------|---------|---------|-----------|---------|---------|------------|-------------------|---------------------|-----------------|
| IRB 2               | 0.462** |         |         |         |         |         |         |        |        |         |         |        |        |         |         |         |           |         |         |            |                   |                     |                 |
| IRB 3               | 0.494** | 0.633** |         |         |         |         |         |        |        |         |         |        |        |         |         |         |           |         |         |            |                   |                     |                 |
| IRB 4               | 0.168   | 0.426** | 0.314*  |         |         |         |         |        |        |         |         |        |        |         |         |         |           |         |         |            |                   |                     |                 |
| IRB 5               | 0.278*  | 0.46**  | 0.485** | 0.392** |         |         |         |        |        |         |         |        |        |         |         |         |           |         |         |            |                   |                     |                 |
| IRB 6               | 0.497** | 0.323*  | 0.276*  | 0.247*  | 0.27*   |         |         |        |        |         |         |        |        |         |         |         |           |         |         |            |                   |                     |                 |
| IRB 7               | -0.007  | 0.198   | 0.078   | 0.258*  | 0.169   | -0.108  |         |        |        |         |         |        |        |         |         |         |           |         |         |            |                   |                     |                 |
| IRB 8               | 0.22*   | 0.028   | -0.010  | -0.023  | 0.031   | 0.032   | -0.085  |        |        |         |         |        |        |         |         |         |           |         |         |            |                   |                     |                 |
| IRB 9               | -0.074  | 0.033   | 0.130   | 0.082   | 0.288*  | -0.004  | 0.175   | 0.180  |        |         |         |        |        |         |         |         |           |         |         |            |                   |                     |                 |
| IRB 10              | 0.065   | 0.229*  | 0.208   | 0.244*  | 0.065   | 0.019   | 0.161   | 0.143  | 0.242* |         |         |        |        |         |         |         |           |         |         |            |                   |                     |                 |
| IRB 11              | 0.051   | 0.125   | 0.174   | 0.211   | 0.093   | -0.116  | 0.228*  | 0.183  | 0.237* | 0.426** |         |        |        |         |         |         |           |         |         |            |                   |                     |                 |
| IRB 12              | -0.23*  | -0.009  | -0.047  | 0.37**  | -0.020  | -0.159  | 0.160   | -0.072 | 0.061  | 0.148   | 0.319*  |        |        |         |         |         |           |         |         |            |                   |                     |                 |
| IRB 13              | -0.054  | 0.352*  | 0.348*  | 0.364** | 0.266*  | -0.041  | 0.170   | 0.235* | 0.246* | 0.373** | 0.407** | 0.265* |        |         |         |         |           |         |         |            |                   |                     |                 |
| Loss                | 0.122   | 0.396** | 0.288*  | 0.305*  | 0.233*  | 0.173   | 0.304*  | 0.111  | 0.219* | 0.434** | 0.255*  | 0.132  | 0.309* |         |         |         |           |         |         |            |                   |                     |                 |
| Harm                | -0.052  | 0.175   | 0.114   | 0.187   | 0.226*  | 0.147   | 0.211   | 0.106  | 0.304* | 0.347*  | 0.244*  | 0.34** | 0.275* | 0.691** |         |         |           |         |         |            |                   |                     |                 |
| Benefit             | -0.248* | -0.124  | -0.076  | 0.157   | -0.014  | -0.040  | 0.441** | -0.180 | 0.251* | -0.030  | 0.069   | 0.295* | 0.008  | 0.175   | 0.27*   |         |           |         |         |            |                   |                     |                 |
| Challenge           | 0.167   | 0.402** | 0.266*  | 0.325*  | 0.371** | 0.277*  | 0.223*  | 0.017  | 0.160  | 0.247*  | 0.182   | 0.238* | 0.282* | 0.622** | 0.492** | 0.135   |           |         |         |            |                   |                     |                 |
| Value               | -0.019  | 0.281*  | 0.085   | 0.184   | 0.140   | 0.098   | 0.349*  | 0.045  | 0.115  | 0.097   | 0.138   | 0.144  | 0.059  | 0.486** | 0.393** | 0.477** | 0.594**   |         |         |            |                   |                     |                 |
| Threat              | 0.23*   | 0.525** | 0.41**  | 0.24*   | 0.292*  | 0.225*  | 0.179   | 0.091  | 0.194  | 0.403** | 0.177   | 0.151  | 0.323* | 0.837** | 0.69**  | 0.103   | 0.61**    | 0.392** |         |            |                   |                     |                 |
| Importance          | 0.154   | 0.489** | 0.372** | 0.257*  | 0.363** | 0.140   | 0.078   | 0.110  | 0.22*  | 0.384** | 0.082   | 0.059  | 0.282* | 0.61**  | 0.484** | 0.064   | 0.473**   | 0.268*  | 0.648** |            |                   |                     |                 |
| ALD: Satisfaction   | -0.111  | 0.018   | 0.062   | 0.027   | 0.029   | -0.136  | 0.112   | 0.030  | 0.137  | 0.397** | 0.127   | 0.226* | 0.31** | 0.472** | 0.497** | 0.060   | 0.172     | -0.093  | 0.458** | 0.409**    |                   |                     |                 |
| ALD: Reconciliation | -0.236* | -0.131  | -0.087  | -0.033  | 0.004   | -0.245* | 0.084   | 0.076  | 0.224* | 0.295*  | 0.28*   | 0.338* | 0.298* | 0.381** | 0.535** | 0.184   | 0.136     | 0.026   | 0.357*  | 0.22*      | 0.782**           |                     |                 |

|                      |        |       |        |       |       |        |       |       |       |        |       |        |        |        |        |       |        |        |        |        |        |        |        |
|----------------------|--------|-------|--------|-------|-------|--------|-------|-------|-------|--------|-------|--------|--------|--------|--------|-------|--------|--------|--------|--------|--------|--------|--------|
| ALD:<br>Distancing   | -0.086 | 0.173 | 0.219* | 0.133 | 0.170 | -0.144 | 0.069 | 0.079 | 0.111 | 0.297* | 0.177 | 0.264* | 0.5*** | 0.47** | 0.516* | 0.005 | 0.28*  | 0.038  | 0.534* | 0.486* | 0.767* | 0.673* |        |
| ALD: Global<br>score | -0.153 | 0.030 | 0.080  | 0.051 | 0.077 | -0.188 | 0.097 | 0.067 | 0.169 | 0.364* | 0.209 | 0.299* | 0.409* | 0.488* | 0.565* | 0.085 | 0.218* | -0.013 | 0.499* | 0.417* | 0.938* | 0.889* | 0.901* |
|                      |        |       |        |       |       |        |       |       |       | *      |       | *      | **     | *      | **     |       |        |        | **     | **     | **     | **     | **     |
