# Supplementary material for: Age, Cognitive Factors, and Acceptance of Living with the Disease in Rheumatoid Arthritis: The Short-Term Perspective
Source: MDPI journal article supplement (doi:10.3390/ijerph19053136), 2022-03-07
Supplement: s1 [file s1]

Supplementary File 11. Acceptance Global Score and subscales: interactions between predictors

| Predictors*                                                                              | Diagnoses | Acceptance Global Score | Satisfaction with Life Despite the Disease | Reconciliation with the Disease | Self-distancing from the Disease |
|------------------------------------------------------------------------------------------|-----------|-------------------------|--------------------------------------------|---------------------------------|----------------------------------|
| Belief regarding one's condition improving (IRB 3)                                       | VD vs D   | t=2.02; p=0.05          | n.s.                                       | t=-2.44; p=0.02                 | t=-2.51; p=0.01                  |
|                                                                                          | RA vs VD  | t=-3.31; p<0.001        | t=-2.65; p=0.01                            | t=-2.51; p=0.01                 | t=-2.77; p=0.01                  |
| Belief regarding the visibility of symptoms (IRB 4)                                      | VD vs D   | t=-2.01; p=0.05         | n.s.                                       | n.s.                            | t=-2.27; p=0.03                  |
| Belief regarding the possibility of predicting the course of the disease (IRB 5)         | VD vs D   | n.s.                    | n.s.                                       | n.s.                            | t=-2.10; p=0.04                  |
| Belief regarding the possibility of predicting the course of the disease (IRB 8)         | RA vs D   | t=-2.03; p=0.05         | n.s.                                       | n.s.                            | t=-2.01; p=0.05                  |
| Belief regarding the possibility of obtaining help from medical personnel (IRB 9)        | RA vs D   | t=-2.18; p=0.03         | n.s.                                       | n.s.                            | n.s.                             |
|                                                                                          | VD vs D   | t=-2.49; p=0.01         | n.s.                                       | t=-2.28; p=0.02                 | t=-2.05; p=0.04                  |
| Belief regarding how embarrassing the disease is (IRB 12)                                | RA vs D   | t=-2.44; p=0.02         | t=-2.39; p=0.02                            | n.s.                            | n.s.                             |
|                                                                                          | VD vs D   | t=-2.40; p=0.02         | t=-2.97; p<0.01                            | n.s.                            | n.s.                             |
| Belief regarding one's condition improving (IRB 3; T2 - T1)                              | VD vs D   | n.s.                    | n.s.                                       | t=2.19; p=0.03                  | n.s.                             |
| Belief regarding the possibility of predicting the course of the disease (IRB 5; T2- T1) | RA vs VD  | t=2.04; p=0.04          | t=3.66; p<0.01                             | n.s.                            | n.s.                             |
|                                                                                          | VD vs D   | n.s.                    | t=2.80; p=0.01                             | n.s.                            | n.s.                             |
| Belief regarding the effectiveness of treatment (T2-T1)                                  | RA vs VD  | n.s.                    | n.s.                                       | n.s.                            | t=-2.07; p=0.04                  |
| Belief about the attitude of other people to people with this disease (IRB 11; T2-T1)    | RA vs VD  | n.s.                    | n.s.                                       | n.s.                            | t=-2.27; p=0.03                  |
| Belief regarding the comparison of disease severity with other people (IRB 13; T2-T1)    | RA vs VD  | n.s.                    | n.s.                                       | n.s.                            | t=-2.05; p=0.04                  |
| Harm                                                                                     | RA vs VD  | t=1.99; p=0.05          | n.s.                                       | n.s.                            | t=2.19; p=0.03                   |
| Importance                                                                               | VD vs D   | t=2.63; p=0.01          | n.s.                                       | n.s.                            | n.s.                             |
| Challenge (T2-T1)                                                                        | RA vs VD  | n.s.                    | n.s.                                       | t=-2.18; p=0.03                 | n.s.                             |
| Harm (T2-T1)                                                                             | RA vs VD  | n.s.                    | n.s.                                       | n.s.                            | t=-2.15; p=0.03                  |
| Threat (T2-T1)                                                                           | RA vs VD  | t=-2.69; p=0.01         | n.s.                                       | t=-3.61; p<0.01                 | t=-2.12; p=0.04                  |
|                                                                                          | RA vs D   | t=1.95; p=0.05          | n.s.                                       | n.s.                            | n.s.                             |
| Age                                                                                      | VD vs D   | t=2.29; p=0.02          | n.s.                                       | n.s.                            | t=3.05; p<0.01                   |
|                                                                                          | RA vs VD  | n.s.                    | n.s.                                       | n.s.                            | t=1.96; p=0.05                   |
| Number of hospitalizations                                                               | VD vs D   | n.s.                    | t=1.97; p=0.05                             | n.s.                            | n.s.                             |

\*Note: only statistically significant interactions are presented in the table. RA – rheumatoid arthritis; VD – vascular diseases; D – diabetes; IRB – illness-related belief; n.s. – not significant
