# Supplementary material for: Age, Cognitive Factors, and Acceptance of Living with the Disease in Rheumatoid Arthritis: The Short-Term Perspective
Source: MDPI journal article supplement (doi:10.3390/ijerph19053136), 2022-03-07
Supplement: s1 [file s1]

Supplementary File 10. Differences between T1 and T2 in subgroups distinguished by diagnosis

Table 1. Differences between T1 and T2 in diabetes patients

| Variables          | T1    |      | T2    |      | t      | p     | Cohen's d |
|--------------------|-------|------|-------|------|--------|-------|-----------|
|                    | M     | SD   | M     | SD   |        |       |           |
| IRB 1              | 9.12  | 1.37 | 8.08  | 2.28 | 2.184  | 0.039 | 0.428     |
| IRB 2              | 8.31  | 1.41 | 7.54  | 1.86 | 1.882  | 0.072 | 0.369     |
| IRB 3              | 6.69  | 1.95 | 6.58  | 2.08 | 0.268  | 0.791 | 0.053     |
| IRB 4              | 3.23  | 2.49 | 3.62  | 2.91 | -0.664 | 0.513 | -0.130    |
| IRB 5              | 5.69  | 2.46 | 5.96  | 2.46 | -0.484 | 0.633 | -0.095    |
| IRB 6              | 7.58  | 1.88 | 7.46  | 1.82 | 0.340  | 0.736 | 0.067     |
| IRB 7              | 5.15  | 2.80 | 5.19  | 2.48 | -0.092 | 0.927 | -0.018    |
| IRB 8              | 3.85  | 2.63 | 4.27  | 2.32 | -0.747 | 0.462 | -0.147    |
| IRB 9              | 4.73  | 2.39 | 4.50  | 2.28 | 0.690  | 0.496 | 0.135     |
| IRB 10             | 4.77  | 1.82 | 4.73  | 1.76 | 0.090  | 0.929 | 0.018     |
| IRB 11             | 3.23  | 2.05 | 3.69  | 2.36 | -1.364 | 0.185 | -0.267    |
| IRB 12             | 2.50  | 2.28 | 2.85  | 2.51 | -1.434 | 0.164 | -0.281    |
| IRB 13             | 3.23  | 1.70 | 3.88  | 1.99 | -1.739 | 0.094 | -0.341    |
| Loss               | 14.35 | 4.55 | 13.35 | 4.15 | 1.653  | 0.111 | 0.324     |
| Harm               | 11.38 | 5.23 | 11.77 | 4.89 | -0.693 | 0.495 | -0.136    |
| Benefit            | 7.27  | 2.15 | 8.15  | 3.26 | -1.716 | 0.098 | -0.337    |
| Challenge          | 15.46 | 4.35 | 14.85 | 4.57 | 1.039  | 0.309 | 0.204     |
| Value              | 12.73 | 3.90 | 12.77 | 4.24 | -0.083 | 0.934 | -0.016    |
| Threat             | 15.85 | 3.64 | 15.35 | 3.89 | 0.879  | 0.388 | 0.172     |
| Importance         | 15.35 | 3.65 | 15.92 | 3.73 | -0.703 | 0.489 | -0.138    |
| ALD satisfaction   | 7.88  | 1.75 | 8.58  | 2.14 | -2.459 | 0.021 | -0.482    |
| ALD reconciliation | 6.85  | 1.67 | 7.27  | 1.76 | -1.897 | 0.069 | -0.372    |
| ALD distancing     | 9.00  | 2.24 | 9.31  | 2.57 | -0.829 | 0.415 | -0.163    |
| ALD Global score   | 23.73 | 4.89 | 25.15 | 5.68 | -1.865 | 0.074 | -0.366    |

Table 2. Differences between T1 and T2 in rheumatoid arthritis patients

| Variables          | T1    |      | T2    |      | t      | p     | Cohen's d |
|--------------------|-------|------|-------|------|--------|-------|-----------|
|                    | M     | SD   | M     | SD   |        |       |           |
| IRB 1              | 8.52  | 1.74 | 8.41  | 1.83 | 0.462  | 0.645 | 0.056     |
| IRB 2              | 7.78  | 2.09 | 7.74  | 2.13 | 0.155  | 0.877 | 0.019     |
| IRB 3              | 7.75  | 1.84 | 7.43  | 2.20 | 1.357  | 0.179 | 0.163     |
| IRB 4              | 5.62  | 2.47 | 4.97  | 2.65 | 2.581  | 0.012 | 0.311     |
| IRB 5              | 7.00  | 2.20 | 6.83  | 2.24 | 0.686  | 0.495 | 0.083     |
| IRB 6              | 7.75  | 1.80 | 7.91  | 1.85 | -0.770 | 0.444 | -0.093    |
| IRB 7              | 4.03  | 2.84 | 4.36  | 2.81 | -1.402 | 0.166 | -0.169    |
| IRB 8              | 5.70  | 2.52 | 5.16  | 2.64 | 1.548  | 0.126 | 0.186     |
| IRB 9              | 5.72  | 2.57 | 5.16  | 2.51 | 1.709  | 0.092 | 0.206     |
| IRB 10             | 5.35  | 2.22 | 5.30  | 2.33 | 0.139  | 0.890 | 0.017     |
| IRB 11             | 4.48  | 2.20 | 4.41  | 2.37 | 0.300  | 0.765 | 0.036     |
| IRB 12             | 2.96  | 2.49 | 3.46  | 2.93 | -2.133 | 0.037 | -0.257    |
| IRB 13             | 4.84  | 2.51 | 4.87  | 2.41 | -0.098 | 0.922 | -0.012    |
| Loss               | 15.23 | 4.96 | 14.91 | 4.93 | 0.710  | 0.480 | 0.085     |
| Harm               | 12.81 | 5.00 | 12.39 | 5.32 | 1.001  | 0.320 | 0.121     |
| Benefit            | 8.35  | 3.66 | 8.93  | 4.30 | -1.636 | 0.106 | -0.197    |
| Challenge          | 16.80 | 4.25 | 16.30 | 4.14 | 1.240  | 0.219 | 0.149     |
| Value              | 14.01 | 4.63 | 14.25 | 4.57 | -0.600 | 0.550 | -0.072    |
| Threat             | 16.01 | 4.20 | 15.29 | 4.78 | 1.746  | 0.085 | 0.210     |
| Importance         | 17.29 | 3.96 | 16.90 | 4.45 | 0.801  | 0.426 | 0.096     |
| ALD satisfaction   | 8.30  | 2.40 | 8.38  | 2.42 | -0.422 | 0.675 | -0.051    |
| ALD reconciliation | 7.29  | 1.93 | 7.29  | 1.93 | 0.000  | 1.000 | 0.000     |
| ALD distancing     | 9.09  | 2.37 | 9.28  | 2.68 | -0.773 | 0.442 | -0.093    |
| ALD Global score   | 24.68 | 5.94 | 24.94 | 6.20 | -0.535 | 0.594 | -0.064    |

Table 3. Differences between T1 and T2 in patients with vascular diseases

| Variables          | T1    |      | T2    |      | t      | p     | Cohen's d |
|--------------------|-------|------|-------|------|--------|-------|-----------|
|                    | M     | SD   | M     | SD   |        |       |           |
| IRB 1              | 9.04  | 1.64 | 8.35  | 2.33 | 1.443  | 0.161 | 0.283     |
| IRB 2              | 7.46  | 2.08 | 7.00  | 2.43 | 1.110  | 0.278 | 0.218     |
| IRB 3              | 7.00  | 2.51 | 6.54  | 2.12 | 1.251  | 0.222 | 0.245     |
| IRB 4              | 4.00  | 2.67 | 4.50  | 2.97 | -0.909 | 0.372 | -0.178    |
| IRB 5              | 5.54  | 2.56 | 5.65  | 2.90 | -0.257 | 0.799 | -0.050    |
| IRB 6              | 8.27  | 1.46 | 8.46  | 1.61 | -0.594 | 0.558 | -0.117    |
| IRB 7              | 4.35  | 2.94 | 5.08  | 2.86 | -1.320 | 0.199 | -0.259    |
| IRB 8              | 4.65  | 2.80 | 5.58  | 3.26 | -1.449 | 0.160 | -0.284    |
| IRB 9              | 4.92  | 3.03 | 5.62  | 2.71 | -0.991 | 0.331 | -0.194    |
| IRB 10             | 3.77  | 2.57 | 4.77  | 2.66 | -1.569 | 0.129 | -0.308    |
| IRB 11             | 2.65  | 2.13 | 3.65  | 2.65 | -1.646 | 0.112 | -0.323    |
| IRB 12             | 2.19  | 2.40 | 2.50  | 2.55 | -0.550 | 0.587 | -0.108    |
| IRB 13             | 3.96  | 2.66 | 4.27  | 2.55 | -0.617 | 0.543 | -0.121    |
| Loss               | 11.85 | 5.29 | 12.00 | 6.49 | -0.174 | 0.863 | -0.034    |
| Harm               | 10.73 | 5.02 | 11.35 | 6.27 | -0.751 | 0.460 | -0.147    |
| Benefit            | 6.85  | 2.13 | 7.92  | 4.60 | -1.267 | 0.217 | -0.248    |
| Challenge          | 14.46 | 5.26 | 14.23 | 5.93 | 0.253  | 0.803 | 0.050     |
| Value              | 12.19 | 4.59 | 12.88 | 5.22 | -1.000 | 0.327 | -0.196    |
| Threat             | 14.08 | 4.75 | 13.31 | 6.02 | 0.895  | 0.380 | 0.175     |
| Importance         | 13.54 | 4.50 | 13.35 | 4.88 | 0.245  | 0.808 | 0.048     |
| ALD satisfaction   | 6.77  | 1.97 | 7.00  | 2.21 | -0.672 | 0.508 | -0.132    |
| ALD reconciliation | 6.35  | 1.85 | 6.23  | 1.90 | 0.306  | 0.762 | 0.060     |
| ALD distancing     | 7.62  | 2.10 | 8.15  | 2.87 | -0.925 | 0.364 | -0.181    |
| ALD Global score   | 20.73 | 5.30 | 21.38 | 6.09 | -0.624 | 0.538 | -0.122    |
