# Supplementary material for: Age, Cognitive Factors, and Acceptance of Living with the Disease in Rheumatoid Arthritis: The Short-Term Perspective
Source: Int J Environ Res Public Health. 2022 Mar 7;19(5):3136. doi: 10.3390/ijerph19053136 (PMC8910175; doi:10.3390/ijerph19053136)
Supplement: Supplementary file 1 [file ijerph-19-03136-s001.zip]

Archive with 15 entries (15 files):
- Supplementary File S1 IRB.pdf
- Supplementary File S10 Differences between T1 and T2 in subgroups distinguished by diagnosis.pdf
- Supplementary File S11.pdf
- Supplementary File S12.tiff
- Supplementary File S13.tiff
- Supplementary File S14.tiff
- Supplementary File S15.tiff
- Supplementary File S2 IRAS.pdf
- Supplementary File S3 IRB disease.tiff
- Supplementary File S4 IRB social.tiff
- Supplementary File S5 CA.tiff
- Supplementary File S6 ALD distancing.tiff
- Supplementary File S7 ALD reconcilement.tiff
- Supplementary File S8 ald satsfaction.tiff
- Supplementary File S9.pdf
